# Supplementary material
Source: publisher figshare collection journal article supplement (https://acs.figshare.com/ndownloader/files/4064188)
Supplement: Supplementary file 1 [file 4064188]

 
data_v63a 
  
_audit_creation_method            SHELXTL 
_chemical_name_systematic 
; 
 ? 
; 
_chemical_name_common             ? 
_chemical_melting_point           ? 
_chemical_formula_moiety          ? 
_chemical_formula_sum 
 'C25 H19 N O' 
_chemical_formula_weight          349.41 
  
loop_ 
 _atom_type_symbol 
 _atom_type_description 
 _atom_type_scat_dispersion_real 
 _atom_type_scat_dispersion_imag 
 _atom_type_scat_source 
 'C'  'C'   0.0181   0.0091 
 'International Tables Vol C Tables 4.2.6.8 and 6.1.1.4' 
 'H'  'H'   0.0000   0.0000 
 'International Tables Vol C Tables 4.2.6.8 and 6.1.1.4' 
 'N'  'N'   0.0311   0.0180 
 'International Tables Vol C Tables 4.2.6.8 and 6.1.1.4' 
 'O'  'O'   0.0492   0.0322 
 'International Tables Vol C Tables 4.2.6.8 and 6.1.1.4' 
  
_symmetry_cell_setting            Orthorhombic 
_symmetry_space_group_name_H-M    Pbca 
  
loop_ 
 _symmetry_equiv_pos_as_xyz 
 'x, y, z' 
 '-x+1/2, -y, z+1/2' 
 '-x, y+1/2, -z+1/2' 
 'x+1/2, -y+1/2, -z' 
 '-x, -y, -z' 
 'x-1/2, y, -z-1/2' 
 'x, -y-1/2, z-1/2' 
 '-x-1/2, y-1/2, z' 
  
_cell_length_a                    23.8895(15) 
_cell_length_b                    9.8805(6) 
_cell_length_c                    30.8596(19) 
_cell_angle_alpha                 90.00 
_cell_angle_beta                  90.00 
_cell_angle_gamma                 90.00 
_cell_volume                      7284.1(8) 
_cell_formula_units_Z             16 
_cell_measurement_temperature     100(2) 
_cell_measurement_reflns_used     9886 
_cell_measurement_theta_min       2.86 
_cell_measurement_theta_max       67.25 
  
_exptl_crystal_description        Needle 
_exptl_crystal_colour             colourless 
_exptl_crystal_size_max           0.15 
_exptl_crystal_size_mid           0.06 
_exptl_crystal_size_min           0.01 
_exptl_crystal_density_meas       ? 
_exptl_crystal_density_diffrn     1.274 
_exptl_crystal_density_method     'not measured' 
_exptl_crystal_F_000              2944 
_exptl_absorpt_coefficient_mu     0.601 
_exptl_absorpt_correction_type    multi-scan 
_exptl_absorpt_correction_T_min   0.804 
_exptl_absorpt_correction_T_max   1.000 
_exptl_absorpt_process_details    ? 
  
_exptl_special_details 
; 
 ? 
; 
  
_diffrn_ambient_temperature       100(2) 
_diffrn_radiation_wavelength      1.54178 
_diffrn_radiation_type            CuK\a 
_diffrn_radiation_source          'Bruker MicroStar microfocus rotating anode' 
_diffrn_radiation_monochromator   'Helios MX high-brilliance multilayer x-ray opt' 
_diffrn_measurement_device_type   'Bruker Platinum 135 CCD area detector' 
_diffrn_measurement_method        '\f and \w scans' 
_diffrn_detector_area_resol_mean  ? 
_diffrn_reflns_number             62045 
_diffrn_reflns_av_R_equivalents   0.0393 
_diffrn_reflns_av_sigmaI/netI     0.0201 
_diffrn_reflns_limit_h_min        -21 
_diffrn_reflns_limit_h_max        28 
_diffrn_reflns_limit_k_min        -11 
_diffrn_reflns_limit_k_max        11 
_diffrn_reflns_limit_l_min        -36 
_diffrn_reflns_limit_l_max        37 
_diffrn_reflns_theta_min          2.86 
_diffrn_reflns_theta_max          67.66 
_reflns_number_total              6473 
_reflns_number_gt                 5712 
_reflns_threshold_expression      >2sigma(I) 
  
_computing_data_collection        'Bruker APEX2' 
_computing_cell_refinement        'Bruker SAINT' 
_computing_data_reduction         'Bruker SAINT' 
_computing_structure_solution     'Bruker SHELXTL' 
_computing_structure_refinement   'Bruker SHELXTL' 
_computing_molecular_graphics     'Bruker SHELXTL' 
_computing_publication_material   'Bruker SHELXTL' 
  
_refine_special_details 
; 
 Refinement of F^2^ against ALL reflections.  The weighted R-factor wR and 
 goodness of fit S are based on F^2^, conventional R-factors R are based 
 on F, with F set to zero for negative F^2^. The threshold expression of 
 F^2^ > 2sigma(F^2^) is used only for calculating R-factors(gt) etc. and is 
 not relevant to the choice of reflections for refinement.  R-factors based 
 on F^2^ are statistically about twice as large as those based on F, and R- 
 factors based on ALL data will be even larger. 
; 
  
_refine_ls_structure_factor_coef  Fsqd 
_refine_ls_matrix_type            full 
_refine_ls_weighting_scheme       calc 
_refine_ls_weighting_details 
 'calc w=1/[\s^2^(Fo^2^)+(0.0392P)^2^+2.4761P] where P=(Fo^2^+2Fc^2^)/3' 
_atom_sites_solution_primary      direct 
_atom_sites_solution_secondary    difmap 
_atom_sites_solution_hydrogens    difmap 
_refine_ls_hydrogen_treatment     refall 
_refine_ls_extinction_method      none 
_refine_ls_extinction_coef        ? 
_refine_ls_number_reflns          6473 
_refine_ls_number_parameters      639 
_refine_ls_number_restraints      0 
_refine_ls_R_factor_all           0.0366 
_refine_ls_R_factor_gt            0.0307 
_refine_ls_wR_factor_ref          0.0818 
_refine_ls_wR_factor_gt           0.0771 
_refine_ls_goodness_of_fit_ref    1.030 
_refine_ls_restrained_S_all       1.030 
_refine_ls_shift/su_max           0.001 
_refine_ls_shift/su_mean          0.000 
  
loop_ 
 _atom_site_label 
 _atom_site_type_symbol 
 _atom_site_fract_x 
 _atom_site_fract_y 
 _atom_site_fract_z 
 _atom_site_U_iso_or_equiv 
 _atom_site_adp_type 
 _atom_site_occupancy 
 _atom_site_symmetry_multiplicity 
 _atom_site_calc_flag 
 _atom_site_refinement_flags 
 _atom_site_disorder_assembly 
 _atom_site_disorder_group 
O1 O 0.28492(3) 0.19609(8) -0.00068(3) 0.02615(19) Uani 1 1 d . . . 
N1 N 0.25260(4) 0.37134(10) 0.03965(3) 0.0223(2) Uani 1 1 d . . . 
C1 C 0.20350(5) 0.42061(13) 0.06487(4) 0.0254(3) Uani 1 1 d . . . 
H1A H 0.1685(6) 0.3907(14) 0.0510(5) 0.031(4) Uiso 1 1 d . . . 
H1B H 0.2048(6) 0.5203(15) 0.0661(4) 0.030(4) Uiso 1 1 d . . . 
C2 C 0.21234(5) 0.35809(14) 0.10984(4) 0.0277(3) Uani 1 1 d . . . 
H2A H 0.1975(6) 0.4183(15) 0.1330(5) 0.032(4) Uiso 1 1 d . . . 
H2B H 0.1932(6) 0.2679(15) 0.1123(4) 0.030(4) Uiso 1 1 d . . . 
C3 C 0.27520(5) 0.34224(11) 0.11164(4) 0.0225(2) Uani 1 1 d . . . 
C4 C 0.31087(5) 0.32179(11) 0.14783(4) 0.0217(2) Uani 1 1 d . . . 
C5 C 0.36773(5) 0.32103(11) 0.14044(4) 0.0219(2) Uani 1 1 d . . . 
H5 H 0.3945(6) 0.3085(13) 0.1647(4) 0.024(3) Uiso 1 1 d . . . 
C6 C 0.39093(5) 0.33852(11) 0.09848(4) 0.0215(2) Uani 1 1 d . . . 
C7 C 0.44975(5) 0.34248(11) 0.09204(4) 0.0240(3) Uani 1 1 d . . . 
H7 H 0.4752(6) 0.3315(14) 0.1174(5) 0.027(3) Uiso 1 1 d . . . 
C8 C 0.47160(5) 0.36299(12) 0.05156(4) 0.0266(3) Uani 1 1 d . . . 
H8A H 0.5122(6) 0.3658(14) 0.0474(4) 0.029(4) Uiso 1 1 d . . . 
C9 C 0.43592(5) 0.37955(12) 0.01545(4) 0.0266(3) Uani 1 1 d . . . 
H9 H 0.4525(6) 0.3932(15) -0.0138(5) 0.035(4) Uiso 1 1 d . . . 
C10 C 0.37914(5) 0.37547(12) 0.02042(4) 0.0242(3) Uani 1 1 d . . . 
H10 H 0.3542(6) 0.3868(14) -0.0043(5) 0.031(4) Uiso 1 1 d . . . 
C11 C 0.35504(5) 0.35487(11) 0.06190(4) 0.0212(2) Uani 1 1 d . . . 
C12 C 0.29685(5) 0.35374(11) 0.07067(4) 0.0215(2) Uani 1 1 d . . . 
C13 C 0.24827(5) 0.28008(11) 0.00614(4) 0.0211(2) Uani 1 1 d . . . 
C14 C 0.19802(5) 0.28718(11) -0.02268(4) 0.0214(2) Uani 1 1 d . . . 
C15 C 0.17966(5) 0.16541(13) -0.04053(4) 0.0269(3) Uani 1 1 d . . . 
H15A H 0.1996(6) 0.0828(15) -0.0331(4) 0.032(4) Uiso 1 1 d . . . 
C16 C 0.13386(6) 0.16356(14) -0.06790(4) 0.0315(3) Uani 1 1 d . . . 
H16A H 0.1205(6) 0.0776(16) -0.0793(5) 0.039(4) Uiso 1 1 d . . . 
C17 C 0.10723(6) 0.28315(14) -0.07874(4) 0.0308(3) Uani 1 1 d . . . 
H17A H 0.0756(7) 0.2815(15) -0.0978(5) 0.035(4) Uiso 1 1 d . . . 
C18 C 0.12609(6) 0.40463(13) -0.06188(4) 0.0310(3) Uani 1 1 d . . . 
H18A H 0.1067(6) 0.4902(16) -0.0690(5) 0.036(4) Uiso 1 1 d . . . 
C19 C 0.17124(5) 0.40747(12) -0.03350(4) 0.0264(3) Uani 1 1 d . . . 
H19A H 0.1848(6) 0.4935(14) -0.0218(4) 0.026(3) Uiso 1 1 d . . . 
C20 C 0.28752(5) 0.30206(11) 0.19201(4) 0.0219(2) Uani 1 1 d . . . 
C21 C 0.24136(5) 0.21801(12) 0.19906(4) 0.0260(3) Uani 1 1 d . . . 
H21A H 0.2243(6) 0.1676(15) 0.1749(5) 0.031(4) Uiso 1 1 d . . . 
C22 C 0.21946(5) 0.20166(13) 0.24032(4) 0.0286(3) Uani 1 1 d . . . 
H22A H 0.1872(6) 0.1416(14) 0.2453(5) 0.032(4) Uiso 1 1 d . . . 
C23 C 0.24327(5) 0.26772(13) 0.27531(4) 0.0292(3) Uani 1 1 d . . . 
H23A H 0.2270(6) 0.2572(15) 0.3045(5) 0.035(4) Uiso 1 1 d . . . 
C24 C 0.28974(5) 0.34910(13) 0.26905(4) 0.0285(3) Uani 1 1 d . . . 
H24A H 0.3077(6) 0.3955(15) 0.2932(5) 0.037(4) Uiso 1 1 d . . . 
C25 C 0.31159(5) 0.36613(12) 0.22773(4) 0.0243(3) Uani 1 1 d . . . 
H25A H 0.3438(6) 0.4267(14) 0.2229(4) 0.025(3) Uiso 1 1 d . . . 
O31 O 0.54806(3) 0.38849(8) 0.16733(3) 0.02441(19) Uani 1 1 d . . . 
N31 N 0.60970(4) 0.42133(9) 0.22267(3) 0.0208(2) Uani 1 1 d . . . 
C31 C 0.63494(5) 0.52375(12) 0.25212(4) 0.0233(2) Uani 1 1 d . . . 
H31A H 0.6314(5) 0.6151(14) 0.2396(4) 0.025(3) Uiso 1 1 d . . . 
H31B H 0.6753(6) 0.5024(13) 0.2563(4) 0.023(3) Uiso 1 1 d . . . 
C32 C 0.60186(5) 0.50508(11) 0.29426(4) 0.0215(2) Uani 1 1 d . . . 
H32A H 0.6245(6) 0.5270(13) 0.3199(4) 0.023(3) Uiso 1 1 d . . . 
H32B H 0.5682(6) 0.5651(14) 0.2947(4) 0.022(3) Uiso 1 1 d . . . 
C33 C 0.58422(4) 0.35798(11) 0.29177(4) 0.0191(2) Uani 1 1 d . . . 
C34 C 0.56611(4) 0.26770(11) 0.32480(4) 0.0193(2) Uani 1 1 d . . . 
C35 C 0.55265(5) 0.13696(11) 0.31239(4) 0.0203(2) Uani 1 1 d . . . 
H35 H 0.5387(5) 0.0716(14) 0.3343(4) 0.024(3) Uiso 1 1 d . . . 
C36 C 0.55782(4) 0.09088(11) 0.26908(4) 0.0202(2) Uani 1 1 d . . . 
C37 C 0.54539(5) -0.04570(12) 0.25774(4) 0.0235(3) Uani 1 1 d . . . 
H37 H 0.5290(6) -0.1053(14) 0.2801(4) 0.028(4) Uiso 1 1 d . . . 
C38 C 0.55616(5) -0.09309(12) 0.21695(4) 0.0262(3) Uani 1 1 d . . . 
H38A H 0.5480(6) -0.1860(15) 0.2095(4) 0.027(3) Uiso 1 1 d . . . 
C39 C 0.57989(5) -0.00672(13) 0.18545(4) 0.0259(3) Uani 1 1 d . . . 
H39 H 0.5887(6) -0.0432(14) 0.1565(5) 0.031(4) Uiso 1 1 d . . . 
C40 C 0.59027(5) 0.12657(12) 0.19462(4) 0.0230(2) Uani 1 1 d . . . 
H40 H 0.6066(5) 0.1848(13) 0.1728(4) 0.020(3) Uiso 1 1 d . . . 
C41 C 0.57812(5) 0.18002(11) 0.23635(4) 0.0198(2) Uani 1 1 d . . . 
C42 C 0.58857(4) 0.31522(11) 0.24947(4) 0.0192(2) Uani 1 1 d . . . 
C43 C 0.58759(5) 0.45127(11) 0.18273(4) 0.0209(2) Uani 1 1 d . . . 
C44 C 0.61612(5) 0.55863(12) 0.15650(4) 0.0230(2) Uani 1 1 d . . . 
C45 C 0.58344(6) 0.63446(12) 0.12804(4) 0.0267(3) Uani 1 1 d . . . 
H45A H 0.5416(6) 0.6223(15) 0.1288(5) 0.033(4) Uiso 1 1 d . . . 
C46 C 0.60842(6) 0.72261(13) 0.09901(4) 0.0323(3) Uani 1 1 d . . . 
H46A H 0.5845(7) 0.7765(16) 0.0794(5) 0.043(4) Uiso 1 1 d . . . 
C47 C 0.66627(7) 0.73318(13) 0.09729(4) 0.0349(3) Uani 1 1 d . . . 
H47A H 0.6840(7) 0.7924(16) 0.0760(5) 0.042(4) Uiso 1 1 d . . . 
C48 C 0.69890(6) 0.65688(14) 0.12515(4) 0.0337(3) Uani 1 1 d . . . 
H48A H 0.7396(7) 0.6594(16) 0.1232(5) 0.038(4) Uiso 1 1 d . . . 
C49 C 0.67408(5) 0.57090(13) 0.15522(4) 0.0277(3) Uani 1 1 d . . . 
H49A H 0.6970(6) 0.5146(15) 0.1745(5) 0.032(4) Uiso 1 1 d . . . 
C50 C 0.56026(5) 0.30868(11) 0.37106(4) 0.0199(2) Uani 1 1 d . . . 
C51 C 0.54056(5) 0.43665(12) 0.38302(4) 0.0237(2) Uani 1 1 d . . . 
H51A H 0.5305(6) 0.5040(14) 0.3611(4) 0.028(3) Uiso 1 1 d . . . 
C52 C 0.53300(5) 0.47019(13) 0.42635(4) 0.0276(3) Uani 1 1 d . . . 
H52A H 0.5197(6) 0.5599(16) 0.4341(4) 0.034(4) Uiso 1 1 d . . . 
C53 C 0.54455(5) 0.37640(13) 0.45863(4) 0.0285(3) Uani 1 1 d . . . 
H53A H 0.5388(6) 0.4023(15) 0.4891(5) 0.034(4) Uiso 1 1 d . . . 
C54 C 0.56451(5) 0.24945(13) 0.44737(4) 0.0275(3) Uani 1 1 d . . . 
H54A H 0.5727(6) 0.1824(15) 0.4697(5) 0.035(4) Uiso 1 1 d . . . 
C55 C 0.57243(5) 0.21576(12) 0.40406(4) 0.0229(2) Uani 1 1 d . . . 
H55B H 0.5875(6) 0.1264(14) 0.3966(4) 0.025(3) Uiso 1 1 d . . . 
  
loop_ 
 _atom_site_aniso_label 
 _atom_site_aniso_U_11 
 _atom_site_aniso_U_22 
 _atom_site_aniso_U_33 
 _atom_site_aniso_U_23 
 _atom_site_aniso_U_13 
 _atom_site_aniso_U_12 
O1 0.0279(5) 0.0202(4) 0.0303(5) -0.0016(3) 0.0024(4) 0.0030(3) 
N1 0.0207(5) 0.0228(5) 0.0234(5) -0.0026(4) -0.0034(4) 0.0035(4) 
C1 0.0216(6) 0.0287(6) 0.0260(6) -0.0057(5) -0.0035(5) 0.0061(5) 
C2 0.0210(6) 0.0370(7) 0.0250(6) -0.0029(5) -0.0024(5) 0.0038(5) 
C3 0.0213(6) 0.0205(6) 0.0258(6) -0.0020(5) -0.0012(5) 0.0009(4) 
C4 0.0223(6) 0.0176(5) 0.0253(6) -0.0007(4) -0.0028(5) 0.0006(4) 
C5 0.0224(6) 0.0179(5) 0.0255(6) 0.0003(4) -0.0052(5) 0.0008(4) 
C6 0.0219(6) 0.0148(5) 0.0277(6) -0.0006(4) -0.0018(5) 0.0010(4) 
C7 0.0218(6) 0.0184(6) 0.0318(7) 0.0005(5) -0.0034(5) 0.0013(4) 
C8 0.0210(6) 0.0225(6) 0.0363(7) 0.0024(5) 0.0019(5) -0.0001(5) 
C9 0.0275(6) 0.0227(6) 0.0297(7) 0.0036(5) 0.0038(5) -0.0004(5) 
C10 0.0254(6) 0.0197(6) 0.0276(6) 0.0024(5) -0.0014(5) 0.0005(5) 
C11 0.0223(6) 0.0150(5) 0.0263(6) -0.0001(4) -0.0015(5) 0.0014(4) 
C12 0.0224(6) 0.0175(5) 0.0247(6) -0.0015(4) -0.0038(5) 0.0030(4) 
C13 0.0249(6) 0.0157(5) 0.0226(6) 0.0026(4) 0.0019(5) -0.0020(4) 
C14 0.0240(6) 0.0210(6) 0.0191(6) -0.0003(4) 0.0015(5) -0.0043(4) 
C15 0.0307(7) 0.0220(6) 0.0278(6) -0.0039(5) 0.0039(5) -0.0038(5) 
C16 0.0349(7) 0.0323(7) 0.0273(7) -0.0101(5) 0.0032(5) -0.0123(6) 
C17 0.0290(7) 0.0443(8) 0.0192(6) 0.0010(5) -0.0033(5) -0.0118(6) 
C18 0.0329(7) 0.0292(7) 0.0307(7) 0.0076(5) -0.0076(5) -0.0048(5) 
C19 0.0310(7) 0.0204(6) 0.0278(6) 0.0014(5) -0.0066(5) -0.0054(5) 
C20 0.0205(6) 0.0195(5) 0.0256(6) 0.0021(4) -0.0021(5) 0.0043(4) 
C21 0.0236(6) 0.0234(6) 0.0311(7) 0.0002(5) -0.0021(5) 0.0004(5) 
C22 0.0229(6) 0.0234(6) 0.0395(7) 0.0062(5) 0.0032(5) 0.0021(5) 
C23 0.0288(6) 0.0297(7) 0.0291(7) 0.0064(5) 0.0046(5) 0.0076(5) 
C24 0.0298(7) 0.0305(6) 0.0253(6) -0.0008(5) -0.0025(5) 0.0046(5) 
C25 0.0222(6) 0.0232(6) 0.0275(6) 0.0016(5) -0.0017(5) 0.0006(5) 
O31 0.0251(4) 0.0241(4) 0.0240(4) -0.0018(3) -0.0039(3) 0.0006(3) 
N31 0.0248(5) 0.0183(5) 0.0192(5) -0.0010(4) -0.0007(4) -0.0028(4) 
C31 0.0296(7) 0.0196(6) 0.0209(6) -0.0013(5) -0.0015(5) -0.0058(5) 
C32 0.0269(6) 0.0184(6) 0.0191(6) -0.0003(4) -0.0013(5) -0.0022(5) 
C33 0.0176(5) 0.0178(5) 0.0220(6) -0.0010(4) -0.0024(4) 0.0014(4) 
C34 0.0165(5) 0.0195(5) 0.0219(6) 0.0003(4) -0.0015(4) 0.0012(4) 
C35 0.0174(5) 0.0193(6) 0.0242(6) 0.0010(5) -0.0012(4) 0.0000(4) 
C36 0.0151(5) 0.0202(5) 0.0255(6) -0.0015(5) -0.0034(4) 0.0008(4) 
C37 0.0185(6) 0.0202(6) 0.0318(7) -0.0014(5) -0.0036(5) -0.0006(4) 
C38 0.0221(6) 0.0198(6) 0.0368(7) -0.0079(5) -0.0058(5) -0.0003(5) 
C39 0.0235(6) 0.0273(6) 0.0268(6) -0.0088(5) -0.0043(5) 0.0030(5) 
C40 0.0203(6) 0.0240(6) 0.0247(6) -0.0025(5) -0.0023(5) 0.0011(5) 
C41 0.0165(5) 0.0205(5) 0.0225(6) -0.0021(4) -0.0030(4) 0.0019(4) 
C42 0.0165(5) 0.0189(5) 0.0220(6) 0.0001(4) -0.0015(4) 0.0005(4) 
C43 0.0238(6) 0.0192(5) 0.0198(6) -0.0029(4) 0.0009(4) 0.0039(5) 
C44 0.0324(6) 0.0198(6) 0.0169(5) -0.0035(4) 0.0017(5) 0.0008(5) 
C45 0.0378(7) 0.0205(6) 0.0219(6) -0.0035(5) 0.0019(5) 0.0056(5) 
C46 0.0530(9) 0.0217(6) 0.0223(6) 0.0000(5) 0.0005(6) 0.0056(6) 
C47 0.0573(9) 0.0260(6) 0.0215(6) 0.0000(5) 0.0075(6) -0.0073(6) 
C48 0.0394(8) 0.0360(7) 0.0257(7) -0.0028(5) 0.0056(6) -0.0090(6) 
C49 0.0331(7) 0.0285(6) 0.0216(6) -0.0004(5) -0.0004(5) -0.0031(5) 
C50 0.0173(5) 0.0202(5) 0.0222(6) 0.0003(4) 0.0003(4) -0.0034(4) 
C51 0.0265(6) 0.0217(6) 0.0230(6) 0.0017(5) 0.0003(5) 0.0000(5) 
C52 0.0324(7) 0.0248(6) 0.0255(6) -0.0027(5) 0.0034(5) 0.0002(5) 
C53 0.0322(7) 0.0332(7) 0.0201(6) -0.0012(5) 0.0026(5) -0.0049(5) 
C54 0.0304(7) 0.0289(6) 0.0233(6) 0.0066(5) -0.0016(5) -0.0056(5) 
C55 0.0238(6) 0.0198(6) 0.0252(6) 0.0022(5) -0.0008(5) -0.0032(5) 
  
_geom_special_details 
; 
 All esds (except the esd in the dihedral angle between two l.s. planes) 
 are estimated using the full covariance matrix.  The cell esds are taken 
 into account individually in the estimation of esds in distances, angles 
 and torsion angles; correlations between esds in cell parameters are only 
 used when they are defined by crystal symmetry.  An approximate (isotropic) 
 treatment of cell esds is used for estimating esds involving l.s. planes. 
; 
  
loop_ 
 _geom_bond_atom_site_label_1 
 _geom_bond_atom_site_label_2 
 _geom_bond_distance 
 _geom_bond_site_symmetry_2 
 _geom_bond_publ_flag 
O1 C13 1.2246(14) . ? 
N1 C13 1.3758(15) . ? 
N1 C12 1.4366(15) . ? 
N1 C1 1.4895(15) . ? 
C1 C2 1.5337(17) . ? 
C1 H1A 0.984(15) . ? 
C1 H1B 0.986(15) . ? 
C2 C3 1.5108(16) . ? 
C2 H2A 0.996(15) . ? 
C2 H2B 1.004(15) . ? 
C3 C12 1.3707(17) . ? 
C3 C4 1.4192(16) . ? 
C4 C5 1.3773(17) . ? 
C4 C20 1.4861(16) . ? 
C5 C6 1.4192(17) . ? 
C5 H5 0.992(14) . ? 
C6 C7 1.4196(16) . ? 
C6 C11 1.4267(16) . ? 
C7 C8 1.3689(18) . ? 
C7 H7 0.997(14) . ? 
C8 C9 1.4124(18) . ? 
C8 H8A 0.979(14) . ? 
C9 C10 1.3656(18) . ? 
C9 H9 0.995(15) . ? 
C10 C11 1.4183(17) . ? 
C10 H10 0.975(15) . ? 
C11 C12 1.4165(16) . ? 
C13 C14 1.4957(16) . ? 
C14 C19 1.3904(17) . ? 
C14 C15 1.3941(16) . ? 
C15 C16 1.3825(19) . ? 
C15 H15A 0.972(15) . ? 
C16 C17 1.383(2) . ? 
C16 H16A 0.973(16) . ? 
C17 C18 1.3837(19) . ? 
C17 H17A 0.958(16) . ? 
C18 C19 1.3896(18) . ? 
C18 H18A 0.989(16) . ? 
C19 H19A 0.978(14) . ? 
C20 C25 1.3951(17) . ? 
C20 C21 1.3975(17) . ? 
C21 C22 1.3859(18) . ? 
C21 H21A 0.985(15) . ? 
C22 C23 1.3841(19) . ? 
C22 H22A 0.984(15) . ? 
C23 C24 1.3842(19) . ? 
C23 H23A 0.986(15) . ? 
C24 C25 1.3882(18) . ? 
C24 H24A 0.975(16) . ? 
C25 H25A 0.986(14) . ? 
O31 C43 1.2255(14) . ? 
N31 C43 1.3733(15) . ? 
N31 C42 1.4276(14) . ? 
N31 C31 1.4879(14) . ? 
C31 C32 1.5327(16) . ? 
C31 H31A 0.986(14) . ? 
C31 H31B 0.995(14) . ? 
C32 C33 1.5152(15) . ? 
C32 H32A 0.982(14) . ? 
C32 H32B 0.999(14) . ? 
C33 C42 1.3759(16) . ? 
C33 C34 1.4219(16) . ? 
C34 C35 1.3852(16) . ? 
C34 C50 1.4905(16) . ? 
C35 C36 1.4172(16) . ? 
C35 H35 0.993(14) . ? 
C36 C41 1.4250(16) . ? 
C36 C37 1.4254(16) . ? 
C37 C38 1.3676(17) . ? 
C37 H37 0.987(14) . ? 
C38 C39 1.4123(18) . ? 
C38 H38A 0.966(14) . ? 
C39 C40 1.3696(17) . ? 
C39 H39 0.987(14) . ? 
C40 C41 1.4219(16) . ? 
C40 H40 0.968(14) . ? 
C41 C42 1.4180(15) . ? 
C43 C44 1.4985(16) . ? 
C44 C49 1.3903(18) . ? 
C44 C45 1.3937(17) . ? 
C45 C46 1.3848(18) . ? 
C45 H45A 1.007(15) . ? 
C46 C47 1.387(2) . ? 
C46 H46A 0.988(17) . ? 
C47 C48 1.384(2) . ? 
C47 H47A 0.975(16) . ? 
C48 C49 1.3910(18) . ? 
C48 H48A 0.975(16) . ? 
C49 H49A 0.982(15) . ? 
C50 C51 1.3987(17) . ? 
C50 C55 1.4016(16) . ? 
C51 C52 1.3896(17) . ? 
C51 H51A 0.980(14) . ? 
C52 C53 1.3881(18) . ? 
C52 H52A 0.971(15) . ? 
C53 C54 1.3861(18) . ? 
C53 H53A 0.983(15) . ? 
C54 C55 1.3903(17) . ? 
C54 H54A 0.977(15) . ? 
C55 H55B 0.981(14) . ? 
  
loop_ 
 _geom_angle_atom_site_label_1 
 _geom_angle_atom_site_label_2 
 _geom_angle_atom_site_label_3 
 _geom_angle 
 _geom_angle_site_symmetry_1 
 _geom_angle_site_symmetry_3 
 _geom_angle_publ_flag 
C13 N1 C12 118.48(9) . . ? 
C13 N1 C1 123.21(10) . . ? 
C12 N1 C1 105.71(9) . . ? 
N1 C1 C2 103.46(9) . . ? 
N1 C1 H1A 110.0(8) . . ? 
C2 C1 H1A 113.0(8) . . ? 
N1 C1 H1B 108.8(8) . . ? 
C2 C1 H1B 111.2(8) . . ? 
H1A C1 H1B 110.1(12) . . ? 
C3 C2 C1 102.23(10) . . ? 
C3 C2 H2A 113.0(8) . . ? 
C1 C2 H2A 111.1(8) . . ? 
C3 C2 H2B 110.9(8) . . ? 
C1 C2 H2B 111.3(8) . . ? 
H2A C2 H2B 108.3(12) . . ? 
C12 C3 C4 120.74(11) . . ? 
C12 C3 C2 109.42(10) . . ? 
C4 C3 C2 129.82(11) . . ? 
C5 C4 C3 117.56(11) . . ? 
C5 C4 C20 121.42(10) . . ? 
C3 C4 C20 121.02(10) . . ? 
C4 C5 C6 122.38(11) . . ? 
C4 C5 H5 120.8(8) . . ? 
C6 C5 H5 116.9(8) . . ? 
C5 C6 C7 121.18(11) . . ? 
C5 C6 C11 120.07(11) . . ? 
C7 C6 C11 118.74(11) . . ? 
C8 C7 C6 120.62(11) . . ? 
C8 C7 H7 119.9(8) . . ? 
C6 C7 H7 119.5(8) . . ? 
C7 C8 C9 120.46(11) . . ? 
C7 C8 H8A 120.2(8) . . ? 
C9 C8 H8A 119.3(8) . . ? 
C10 C9 C8 120.50(12) . . ? 
C10 C9 H9 120.1(9) . . ? 
C8 C9 H9 119.4(9) . . ? 
C9 C10 C11 120.57(12) . . ? 
C9 C10 H10 121.1(8) . . ? 
C11 C10 H10 118.3(8) . . ? 
C12 C11 C10 124.89(11) . . ? 
C12 C11 C6 115.96(10) . . ? 
C10 C11 C6 119.11(11) . . ? 
C3 C12 C11 123.17(11) . . ? 
C3 C12 N1 110.31(10) . . ? 
C11 C12 N1 126.44(11) . . ? 
O1 C13 N1 121.31(11) . . ? 
O1 C13 C14 120.22(10) . . ? 
N1 C13 C14 118.46(10) . . ? 
C19 C14 C15 119.88(11) . . ? 
C19 C14 C13 123.51(10) . . ? 
C15 C14 C13 116.55(11) . . ? 
C16 C15 C14 120.12(12) . . ? 
C16 C15 H15A 121.4(8) . . ? 
C14 C15 H15A 118.5(8) . . ? 
C15 C16 C17 120.03(12) . . ? 
C15 C16 H16A 119.4(9) . . ? 
C17 C16 H16A 120.6(9) . . ? 
C16 C17 C18 120.03(12) . . ? 
C16 C17 H17A 119.8(9) . . ? 
C18 C17 H17A 120.2(9) . . ? 
C17 C18 C19 120.48(12) . . ? 
C17 C18 H18A 120.4(9) . . ? 
C19 C18 H18A 119.1(9) . . ? 
C18 C19 C14 119.42(11) . . ? 
C18 C19 H19A 120.4(8) . . ? 
C14 C19 H19A 120.1(8) . . ? 
C25 C20 C21 118.17(11) . . ? 
C25 C20 C4 120.70(10) . . ? 
C21 C20 C4 121.13(11) . . ? 
C22 C21 C20 120.67(12) . . ? 
C22 C21 H21A 118.7(8) . . ? 
C20 C21 H21A 120.6(8) . . ? 
C23 C22 C21 120.44(12) . . ? 
C23 C22 H22A 119.0(8) . . ? 
C21 C22 H22A 120.6(8) . . ? 
C22 C23 C24 119.66(12) . . ? 
C22 C23 H23A 120.0(9) . . ? 
C24 C23 H23A 120.4(9) . . ? 
C23 C24 C25 120.00(12) . . ? 
C23 C24 H24A 121.3(9) . . ? 
C25 C24 H24A 118.7(9) . . ? 
C24 C25 C20 121.05(12) . . ? 
C24 C25 H25A 120.4(8) . . ? 
C20 C25 H25A 118.5(8) . . ? 
C43 N31 C42 122.83(9) . . ? 
C43 N31 C31 123.90(9) . . ? 
C42 N31 C31 106.79(9) . . ? 
N31 C31 C32 103.14(9) . . ? 
N31 C31 H31A 110.4(8) . . ? 
C32 C31 H31A 113.5(8) . . ? 
N31 C31 H31B 109.2(7) . . ? 
C32 C31 H31B 111.3(7) . . ? 
H31A C31 H31B 109.1(11) . . ? 
C33 C32 C31 102.47(9) . . ? 
C33 C32 H32A 113.9(8) . . ? 
C31 C32 H32A 111.9(8) . . ? 
C33 C32 H32B 110.2(8) . . ? 
C31 C32 H32B 110.9(7) . . ? 
H32A C32 H32B 107.5(10) . . ? 
C42 C33 C34 120.69(10) . . ? 
C42 C33 C32 108.76(10) . . ? 
C34 C33 C32 130.55(10) . . ? 
C35 C34 C33 117.22(10) . . ? 
C35 C34 C50 119.76(10) . . ? 
C33 C34 C50 123.01(10) . . ? 
C34 C35 C36 122.69(11) . . ? 
C34 C35 H35 119.7(8) . . ? 
C36 C35 H35 117.6(8) . . ? 
C35 C36 C41 119.96(10) . . ? 
C35 C36 C37 121.16(11) . . ? 
C41 C36 C37 118.82(11) . . ? 
C38 C37 C36 120.72(11) . . ? 
C38 C37 H37 120.9(8) . . ? 
C36 C37 H37 118.4(8) . . ? 
C37 C38 C39 120.15(11) . . ? 
C37 C38 H38A 120.4(8) . . ? 
C39 C38 H38A 119.4(8) . . ? 
C40 C39 C38 120.77(11) . . ? 
C40 C39 H39 120.0(8) . . ? 
C38 C39 H39 119.3(8) . . ? 
C39 C40 C41 120.48(12) . . ? 
C39 C40 H40 120.0(8) . . ? 
C41 C40 H40 119.5(8) . . ? 
C42 C41 C40 124.93(11) . . ? 
C42 C41 C36 116.09(10) . . ? 
C40 C41 C36 118.80(10) . . ? 
C33 C42 C41 123.15(10) . . ? 
C33 C42 N31 110.54(10) . . ? 
C41 C42 N31 126.07(10) . . ? 
O31 C43 N31 122.37(11) . . ? 
O31 C43 C44 119.95(10) . . ? 
N31 C43 C44 117.54(10) . . ? 
C49 C44 C45 119.55(11) . . ? 
C49 C44 C43 122.01(11) . . ? 
C45 C44 C43 117.78(11) . . ? 
C46 C45 C44 120.29(13) . . ? 
C46 C45 H45A 121.2(8) . . ? 
C44 C45 H45A 118.5(8) . . ? 
C45 C46 C47 120.10(13) . . ? 
C45 C46 H46A 119.0(9) . . ? 
C47 C46 H46A 120.9(9) . . ? 
C48 C47 C46 119.78(12) . . ? 
C48 C47 H47A 120.0(9) . . ? 
C46 C47 H47A 120.2(9) . . ? 
C47 C48 C49 120.46(13) . . ? 
C47 C48 H48A 120.7(9) . . ? 
C49 C48 H48A 118.8(9) . . ? 
C44 C49 C48 119.79(12) . . ? 
C44 C49 H49A 119.3(8) . . ? 
C48 C49 H49A 120.9(9) . . ? 
C51 C50 C55 118.06(11) . . ? 
C51 C50 C34 121.99(10) . . ? 
C55 C50 C34 119.90(10) . . ? 
C52 C51 C50 120.87(11) . . ? 
C52 C51 H51A 118.2(8) . . ? 
C50 C51 H51A 120.9(8) . . ? 
C53 C52 C51 120.36(12) . . ? 
C53 C52 H52A 119.9(8) . . ? 
C51 C52 H52A 119.7(8) . . ? 
C54 C53 C52 119.52(12) . . ? 
C54 C53 H53A 121.5(9) . . ? 
C52 C53 H53A 118.9(9) . . ? 
C53 C54 C55 120.29(11) . . ? 
C53 C54 H54A 120.4(9) . . ? 
C55 C54 H54A 119.3(9) . . ? 
C54 C55 C50 120.89(11) . . ? 
C54 C55 H55B 119.4(8) . . ? 
C50 C55 H55B 119.7(8) . . ? 
  
loop_ 
 _geom_torsion_atom_site_label_1 
 _geom_torsion_atom_site_label_2 
 _geom_torsion_atom_site_label_3 
 _geom_torsion_atom_site_label_4 
 _geom_torsion 
 _geom_torsion_site_symmetry_1 
 _geom_torsion_site_symmetry_2 
 _geom_torsion_site_symmetry_3 
 _geom_torsion_site_symmetry_4 
 _geom_torsion_publ_flag 
C13 N1 C1 C2 111.55(12) . . . . ? 
C12 N1 C1 C2 -29.35(12) . . . . ? 
N1 C1 C2 C3 27.02(12) . . . . ? 
C1 C2 C3 C12 -15.88(13) . . . . ? 
C1 C2 C3 C4 162.65(12) . . . . ? 
C12 C3 C4 C5 3.27(17) . . . . ? 
C2 C3 C4 C5 -175.11(12) . . . . ? 
C12 C3 C4 C20 -176.77(10) . . . . ? 
C2 C3 C4 C20 4.84(19) . . . . ? 
C3 C4 C5 C6 -0.59(17) . . . . ? 
C20 C4 C5 C6 179.46(10) . . . . ? 
C4 C5 C6 C7 177.56(11) . . . . ? 
C4 C5 C6 C11 -1.35(17) . . . . ? 
C5 C6 C7 C8 -178.26(11) . . . . ? 
C11 C6 C7 C8 0.66(17) . . . . ? 
C6 C7 C8 C9 -0.48(18) . . . . ? 
C7 C8 C9 C10 0.06(18) . . . . ? 
C8 C9 C10 C11 0.15(18) . . . . ? 
C9 C10 C11 C12 177.68(11) . . . . ? 
C9 C10 C11 C6 0.04(17) . . . . ? 
C5 C6 C11 C12 0.65(15) . . . . ? 
C7 C6 C11 C12 -178.29(10) . . . . ? 
C5 C6 C11 C10 178.49(10) . . . . ? 
C7 C6 C11 C10 -0.44(16) . . . . ? 
C4 C3 C12 C11 -4.14(17) . . . . ? 
C2 C3 C12 C11 174.55(10) . . . . ? 
C4 C3 C12 N1 178.96(10) . . . . ? 
C2 C3 C12 N1 -2.36(13) . . . . ? 
C10 C11 C12 C3 -175.63(11) . . . . ? 
C6 C11 C12 C3 2.07(16) . . . . ? 
C10 C11 C12 N1 0.76(18) . . . . ? 
C6 C11 C12 N1 178.46(10) . . . . ? 
C13 N1 C12 C3 -122.68(11) . . . . ? 
C1 N1 C12 C3 20.44(12) . . . . ? 
C13 N1 C12 C11 60.54(15) . . . . ? 
C1 N1 C12 C11 -156.34(11) . . . . ? 
C12 N1 C13 O1 -9.27(16) . . . . ? 
C1 N1 C13 O1 -145.59(11) . . . . ? 
C12 N1 C13 C14 171.99(10) . . . . ? 
C1 N1 C13 C14 35.67(15) . . . . ? 
O1 C13 C14 C19 -144.85(12) . . . . ? 
N1 C13 C14 C19 33.91(16) . . . . ? 
O1 C13 C14 C15 32.37(16) . . . . ? 
N1 C13 C14 C15 -148.88(11) . . . . ? 
C19 C14 C15 C16 -1.97(18) . . . . ? 
C13 C14 C15 C16 -179.29(11) . . . . ? 
C14 C15 C16 C17 2.07(19) . . . . ? 
C15 C16 C17 C18 -0.61(19) . . . . ? 
C16 C17 C18 C19 -1.0(2) . . . . ? 
C17 C18 C19 C14 1.0(2) . . . . ? 
C15 C14 C19 C18 0.41(18) . . . . ? 
C13 C14 C19 C18 177.54(12) . . . . ? 
C5 C4 C20 C25 42.65(16) . . . . ? 
C3 C4 C20 C25 -137.30(12) . . . . ? 
C5 C4 C20 C21 -136.65(12) . . . . ? 
C3 C4 C20 C21 43.40(16) . . . . ? 
C25 C20 C21 C22 1.50(17) . . . . ? 
C4 C20 C21 C22 -179.17(11) . . . . ? 
C20 C21 C22 C23 -0.46(18) . . . . ? 
C21 C22 C23 C24 -0.91(19) . . . . ? 
C22 C23 C24 C25 1.20(19) . . . . ? 
C23 C24 C25 C20 -0.13(18) . . . . ? 
C21 C20 C25 C24 -1.21(17) . . . . ? 
C4 C20 C25 C24 179.46(11) . . . . ? 
C43 N31 C31 C32 124.88(11) . . . . ? 
C42 N31 C31 C32 -27.37(11) . . . . ? 
N31 C31 C32 C33 27.27(11) . . . . ? 
C31 C32 C33 C42 -18.61(12) . . . . ? 
C31 C32 C33 C34 160.67(11) . . . . ? 
C42 C33 C34 C35 -0.72(16) . . . . ? 
C32 C33 C34 C35 -179.92(11) . . . . ? 
C42 C33 C34 C50 -179.57(10) . . . . ? 
C32 C33 C34 C50 1.22(18) . . . . ? 
C33 C34 C35 C36 1.82(16) . . . . ? 
C50 C34 C35 C36 -179.29(10) . . . . ? 
C34 C35 C36 C41 0.66(17) . . . . ? 
C34 C35 C36 C37 177.84(10) . . . . ? 
C35 C36 C37 C38 -172.96(11) . . . . ? 
C41 C36 C37 C38 4.26(16) . . . . ? 
C36 C37 C38 C39 0.05(17) . . . . ? 
C37 C38 C39 C40 -2.75(18) . . . . ? 
C38 C39 C40 C41 1.00(18) . . . . ? 
C39 C40 C41 C42 178.31(11) . . . . ? 
C39 C40 C41 C36 3.33(17) . . . . ? 
C35 C36 C41 C42 -4.04(15) . . . . ? 
C37 C36 C41 C42 178.71(10) . . . . ? 
C35 C36 C41 C40 171.37(10) . . . . ? 
C37 C36 C41 C40 -5.88(16) . . . . ? 
C34 C33 C42 C41 -2.96(17) . . . . ? 
C32 C33 C42 C41 176.40(10) . . . . ? 
C34 C33 C42 N31 -177.54(10) . . . . ? 
C32 C33 C42 N31 1.83(13) . . . . ? 
C40 C41 C42 C33 -169.83(11) . . . . ? 
C36 C41 C42 C33 5.27(16) . . . . ? 
C40 C41 C42 N31 3.88(18) . . . . ? 
C36 C41 C42 N31 178.98(10) . . . . ? 
C43 N31 C42 C33 -136.01(11) . . . . ? 
C31 N31 C42 C33 16.61(12) . . . . ? 
C43 N31 C42 C41 49.61(16) . . . . ? 
C31 N31 C42 C41 -157.78(11) . . . . ? 
C42 N31 C43 O31 -0.07(17) . . . . ? 
C31 N31 C43 O31 -148.03(11) . . . . ? 
C42 N31 C43 C44 -175.81(10) . . . . ? 
C31 N31 C43 C44 36.22(15) . . . . ? 
O31 C43 C44 C49 -136.81(12) . . . . ? 
N31 C43 C44 C49 39.04(16) . . . . ? 
O31 C43 C44 C45 33.85(16) . . . . ? 
N31 C43 C44 C45 -150.30(10) . . . . ? 
C49 C44 C45 C46 -0.72(17) . . . . ? 
C43 C44 C45 C46 -171.62(11) . . . . ? 
C44 C45 C46 C47 1.75(18) . . . . ? 
C45 C46 C47 C48 -0.99(19) . . . . ? 
C46 C47 C48 C49 -0.8(2) . . . . ? 
C45 C44 C49 C48 -1.05(18) . . . . ? 
C43 C44 C49 C48 169.45(11) . . . . ? 
C47 C48 C49 C44 1.82(19) . . . . ? 
C35 C34 C50 C51 -141.34(11) . . . . ? 
C33 C34 C50 C51 37.48(16) . . . . ? 
C35 C34 C50 C55 35.95(15) . . . . ? 
C33 C34 C50 C55 -145.22(11) . . . . ? 
C55 C50 C51 C52 -0.39(17) . . . . ? 
C34 C50 C51 C52 176.96(11) . . . . ? 
C50 C51 C52 C53 -0.45(19) . . . . ? 
C51 C52 C53 C54 0.94(19) . . . . ? 
C52 C53 C54 C55 -0.58(19) . . . . ? 
C53 C54 C55 C50 -0.27(18) . . . . ? 
C51 C50 C55 C54 0.75(17) . . . . ? 
C34 C50 C55 C54 -176.65(11) . . . . ? 
  
_diffrn_measured_fraction_theta_max    0.984 
_diffrn_reflns_theta_full              67.66 
_diffrn_measured_fraction_theta_full   0.984 
_refine_diff_density_max    0.213 
_refine_diff_density_min   -0.206 
_refine_diff_density_rms    0.032 
